# Supplementary material for: Bacterial-Specific Induction of Inflammatory Cytokines Significantly Decreases upon Dual Species Infections of Implant Materials with Periodontal Pathogens in a Mouse Model
Source: MDPI journal article supplement (doi:10.3390/biomedicines10020286), 2022-01-26
Supplement: s1 [file s1]

## SUPPLEMENTARY INFORMATION

### **Bacterial-specific induction of inflammatory cytokines significantly decreases upon dual species infections of implant materials with periodontal pathogens in a mouse model**

Muhammad Imran Rahim<sup>1\*</sup>, Andreas Winkel<sup>1</sup>, Alexandra Ingendoh-Tsakmakidis<sup>1</sup>, Stefan Lienenklaus<sup>2</sup>, Christine S. Falk<sup>4</sup>, Michael Eisenburger<sup>1</sup>, Meike Stiesch<sup>1</sup>

<sup>1</sup>Department of Prosthetic Dentistry and Biomedical Materials Science, Lower Saxony Centre for Biomedical Engineering, Implant Research and Development (NIFE), Hannover Medical School, Hannover, Germany

<sup>2</sup>Institute of Laboratory Animal Science, Hannover Medical School, Hannover, Germany

<sup>3</sup>Department of Orthopedic Surgery, Lower Saxony Centre for Biomedical Engineering, Implant Research and Development (NIFE), Hannover Medical School, Hannover, Germany

<sup>4</sup>Institute of Transplant Immunology, Hannover Medical School, Hannover, Germany

#### Corresponding Author

\*Dr. Muhammad Imran Rahim  
Department of Prosthetic Dentistry and Biomedical Materials Science  
Hannover Medical School, Hannover, Germany  
Email: Rahim.Muhammad@mh-hannover.de

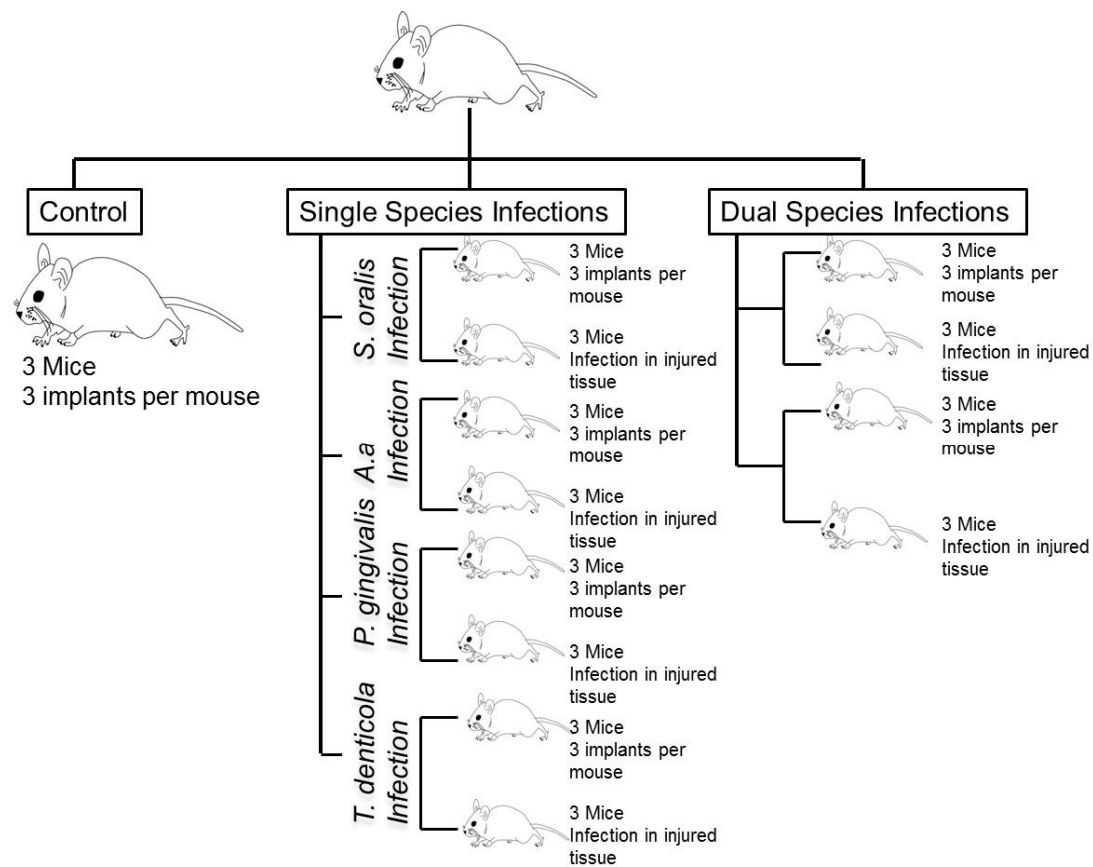

**Figure S1.** Classification of mice into respective groups for the measurement of cytokines.

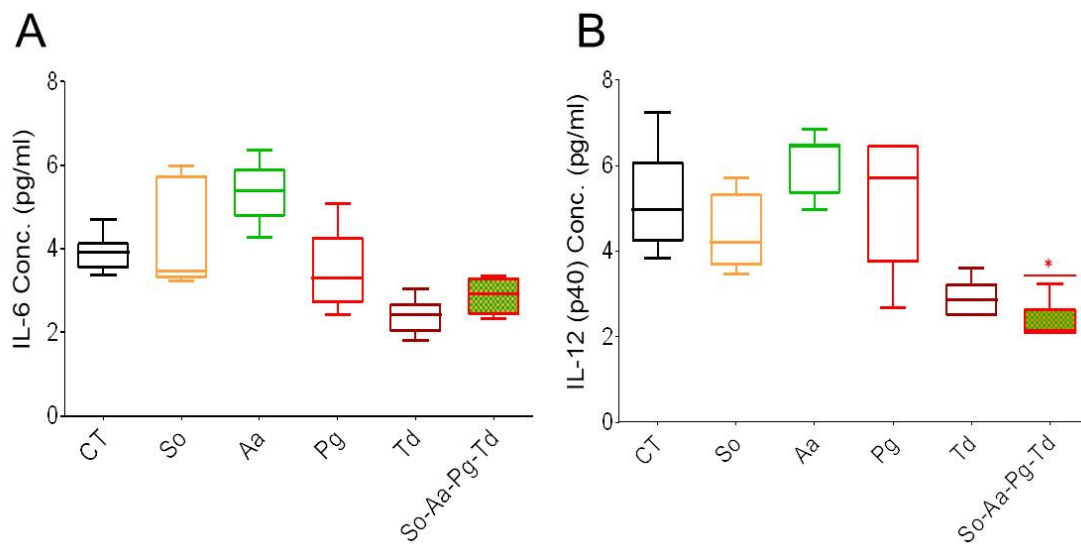

**Figure S2.** Expression of interleukins IL-6 (A) and IL-12 (B) in murine fibroblast.

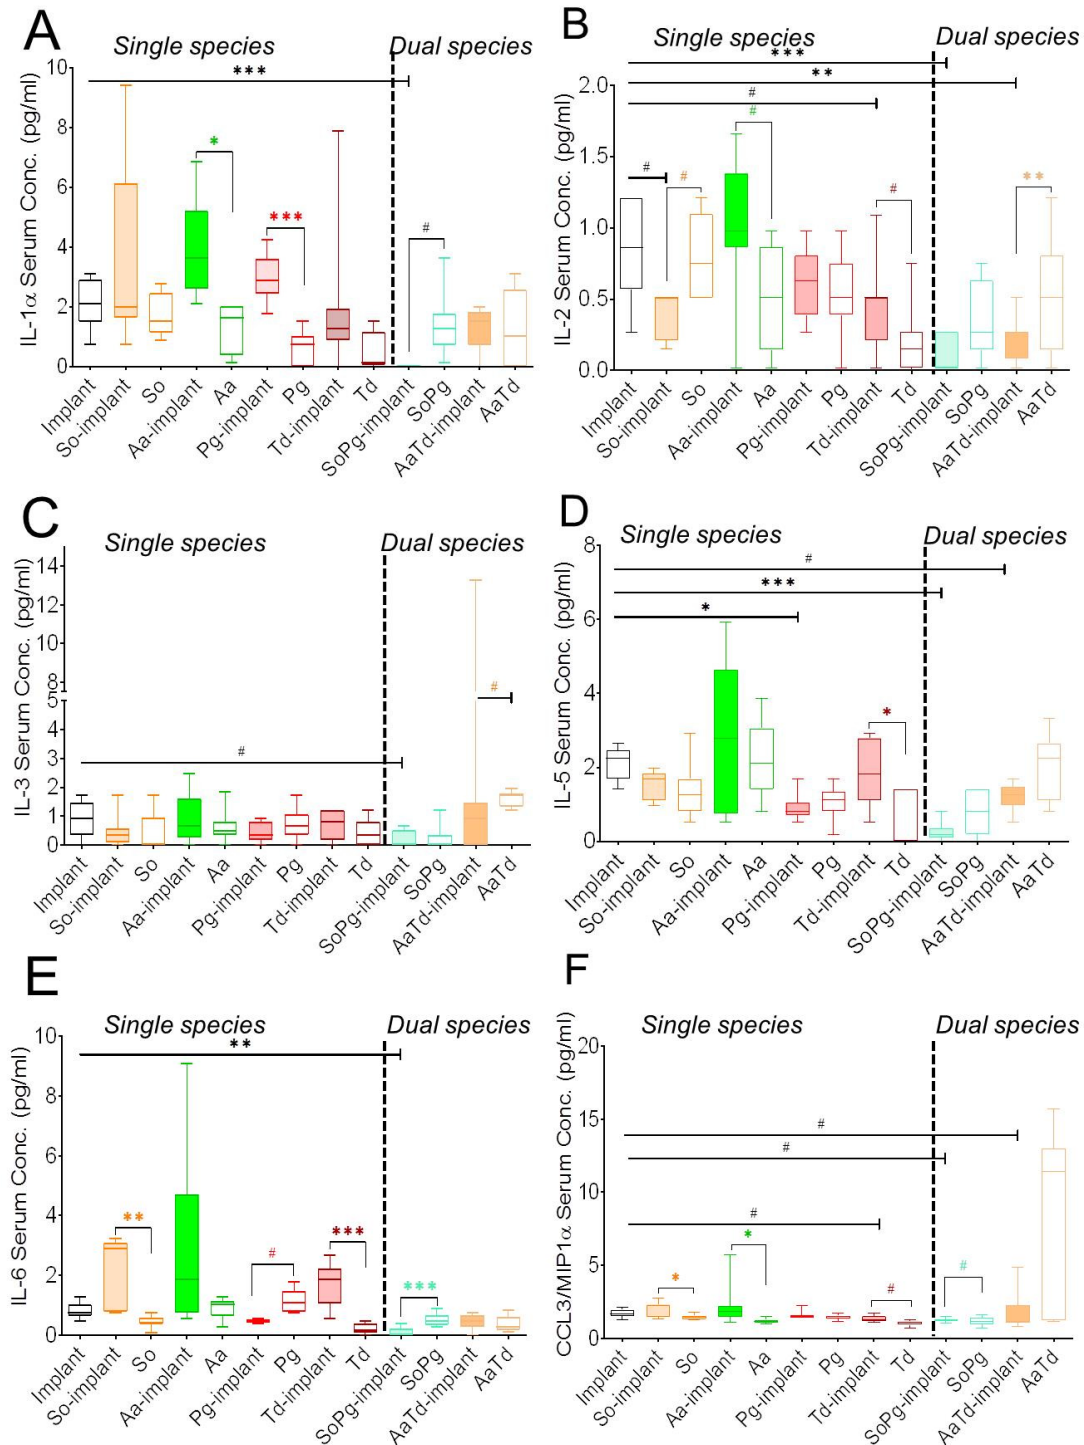

**Figure S3.** Systemic profiles of inflammatory cytokines 21 days post-implantation. Systemic cytokine expressed in the concentration of 0-10 pg/mL for IL-1 $\alpha$  (A), IL-2 (B), IL-3 (C), IL-5 (D), IL-6 (E), CCL3/MIP1 $\alpha$  (F) were determined in the blood serum of mice carrying infected implants.

**Supplementary Table S1.** List of cytokines in pictograms per microliter (pg/ml) expressed near or below detection limits. (biological replicates (n=3), technical replicates (3) each)

|                                           | IL-1b | IL-4 | IL-10 | GM-CSF |
|-------------------------------------------|-------|------|-------|--------|
| Sterile implant                           | 0.57  | 0.27 | 2.92  | -      |
|                                           | 0.57  | 0.27 | 0.83  |        |
|                                           | 0.57  | 0.09 | 2.92  |        |
|                                           | 1.99  |      | 0.83  |        |
| implant + <i>S. oralis</i>                | 0.57  | 0.45 | 0.83  | -      |
|                                           | 0.57  |      | 2.92  |        |
|                                           | 3.15  |      |       |        |
|                                           | 0.57  |      |       |        |
|                                           | 1.99  |      |       |        |
| <i>S. oralis</i> infection                | 0.57  | 0.45 | 2.92  | -      |
|                                           | 0.57  |      |       |        |
|                                           | 0.57  |      |       |        |
|                                           | 0.57  |      |       |        |
| Implant + <i>A. actinomycetemcomitans</i> | 1.99  | 0.62 | 6.51  | -      |
|                                           | 3.15  | 1.31 | 0.83  |        |
|                                           | 2.59  | 2.99 | 3.86  |        |
|                                           |       | 0.45 | 4.77  |        |
|                                           |       |      | 0.83  |        |
| <i>A. actinomycetemcomitans</i> infection | 0.57  | -    | 0.83  | -      |
|                                           | 0.57  |      |       |        |
| Pg-implant                                | 0.57  | 0.27 | 6.51  | -      |
|                                           | 1.99  | 0.27 | 6.51  |        |
|                                           |       |      | 0.83  |        |
|                                           |       |      | 2.92  |        |
|                                           |       |      | 4.77  |        |
|                                           |       |      | 1.92  |        |
| Pg                                        | 0.57  | -    | 0.83  | -      |
|                                           |       |      | 0.83  |        |
| Td-implant                                | 0.57  | 1.14 | -     | -      |
| Td                                        | -     | -    | 4.77  | -      |
| SoPg-implant                              | -     | -    | 0.83  | -      |
|                                           |       |      | 0.83  |        |
|                                           |       |      | 2.92  |        |
| SoPg                                      | -     | -    | 0.83  | -      |

|              |      |      |      |       |
|--------------|------|------|------|-------|
| AaTd-implant | 0.57 | 1.48 | 0.83 | 7.76  |
| AaTd         | -    | 1.90 | 0.83 | 10.68 |
|              |      | 1.48 | 2.92 | 1.13  |
|              |      | 1.65 | 6.51 | 7.76  |
|              |      | 1.31 | 2.92 | 14.58 |
|              |      |      | 8.17 | 9.77  |
|              |      |      | 2.92 |       |

**Supplementary Table S2.** Dual vs single species infections: Cytokine expression decreases with dual species infections compared to single species infections

| Cytokines           | SoPg vs So | SoPg vs Pg | SoPg-implant vs So-implant | SoPg-implant vs Pg-implant | AaTd- vs Aa | AaTd- vs Td | AaTd-implant- vs Aa-implant | AaTd-implant- vs Td-implant |
|---------------------|------------|------------|----------------------------|----------------------------|-------------|-------------|-----------------------------|-----------------------------|
| IL-1 $\alpha$       |            |            | ↓***                       | ↓***                       |             |             | ↓*                          |                             |
| IL-2                | ↓#         |            |                            | ↓*                         | ↑#          |             |                             | ↓***                        |
| IL-3                |            | ↓#         |                            |                            | ↑#          | ↑**         |                             |                             |
| IL-5                |            |            |                            | ↓*                         |             | ↑**         |                             |                             |
| IL-6                |            | ↓#         | ↓***                       | ↓#                         |             | ↓#          | ↓*                          | ↓*                          |
| IL-9                |            | ↓***       | ↓#                         | ↓#                         |             | ↑*          |                             |                             |
| IL-12(p40)          | ↑#         | ↑***       | ↓**                        | ↓***                       |             |             | ↓#                          | ↓*                          |
| IL-12(p70)          |            | ↓#         |                            |                            | *           |             | ↑                           |                             |
| IL-13               |            |            | ↓#                         | ↓#                         |             | ↓#          | ↓#                          | ↓#                          |
| CXCL1/KC            |            |            | ↓***                       |                            | ↓*          |             | ↓#                          |                             |
| CCL5/RANTES         | ↑#         | ↑*         | ↓#                         |                            |             | ↑**         | ↓#                          | ↓#                          |
| CCL-3/MIP1 $\alpha$ |            | ↓#         | ↓#                         | ↓#                         | ↑**         | ↑***        | ↓#                          |                             |
| CCL11               |            |            | ↓#                         |                            |             |             |                             |                             |
| IFN- $\gamma$       |            | ↓***       | ↓#                         | ↓#                         |             | ↑**         |                             |                             |
| G-CSF               |            |            |                            | ↓*                         | ↓#          |             | ↓***                        | ↓**                         |
| TNF- $\alpha$       |            | ↓#         |                            |                            |             | ↑*          |                             |                             |
| CCL2/MCP-1          | ↓*         |            | ↓***                       | ↓#                         |             |             | ↓#                          | ↓#                          |
| Upregulated         | 2          | 2          | 0                          | 0                          | 3           | 8           | 0                           | 0                           |
| Downregulated       | 2          | 7          | 11                         | 11                         | 2           | 2           | 9                           | 7                           |

Statistically significant increase (↑) or decrease (↓) in the serum cytokine levels at \*\*\*, \*\*, \*, and # indicated  $p < 0.001$ ,  $p < 0.01$ ,  $p < 0.05$ , and significant  $p$  value prior to Bonferroni correction, respectively, between implants and infected implants in mice upon single or dual species infections.
